# Supplementary material for: Tau fibrils induce nanoscale membrane damage and nucleate cytosolic tau at lysosomes
Source: PubMed Central journal article supplement — Proc Natl Acad Sci U S A. 2024 May 23;121(22):e2315690121. doi: 10.1073/pnas.2315690121 (PMC11145263; doi:10.1073/pnas.2315690121), 2024-05-23
Supplement: pnas.2315690121.sapp.pdf [file pnas.2315690121.sapp.pdf]

## Supporting Information for

Tau fibrils induce nanoscale membrane damage and nucleate cytosolic tau at lysosomes

Kevin Rose, Tyler Jepson, Sankalp Shukla, Alex Maya-Romero, Martin Kampmann, Ke Xu, and James H. Hurley\*

James H. Hurley email: jimhurley@berkeley.edu

### This PDF file includes:

Legends for Movies S1 and S2  
Legends for Datasets S1 and S2

### Other supporting materials for this manuscript include the following:

**Movie S1:** A 3D STORM example of a lysosome (magenta) with K18.tau aggregates (green) from PFF-treated astrocytes is shown and rotated.

**Movie S2:** A 3D STORM example of a PFF (magenta) with K18.tau aggregates (green) from PFF-treated astrocytes is shown and rotated.

**Data set S1:** Single cell P Values from two-way ANOVA comparison from the pHLARE experiment Figure 1B. All three biological replicate data is included for each treatment.

**Data set S2:** Data for the three individual Linear Regressions determined in the pHLARE experiment Figure 1E
